# Supplementary material
Source: Springer Nature journal article supplement (https://www.springermedizin.de/resource/supplementary/13054_2011_9621_MOESM2_ESM.pdf/9706590)

- relative # of death
- ▲ % of positive bc without CNS

phase 0    phase I    phase II    phase III

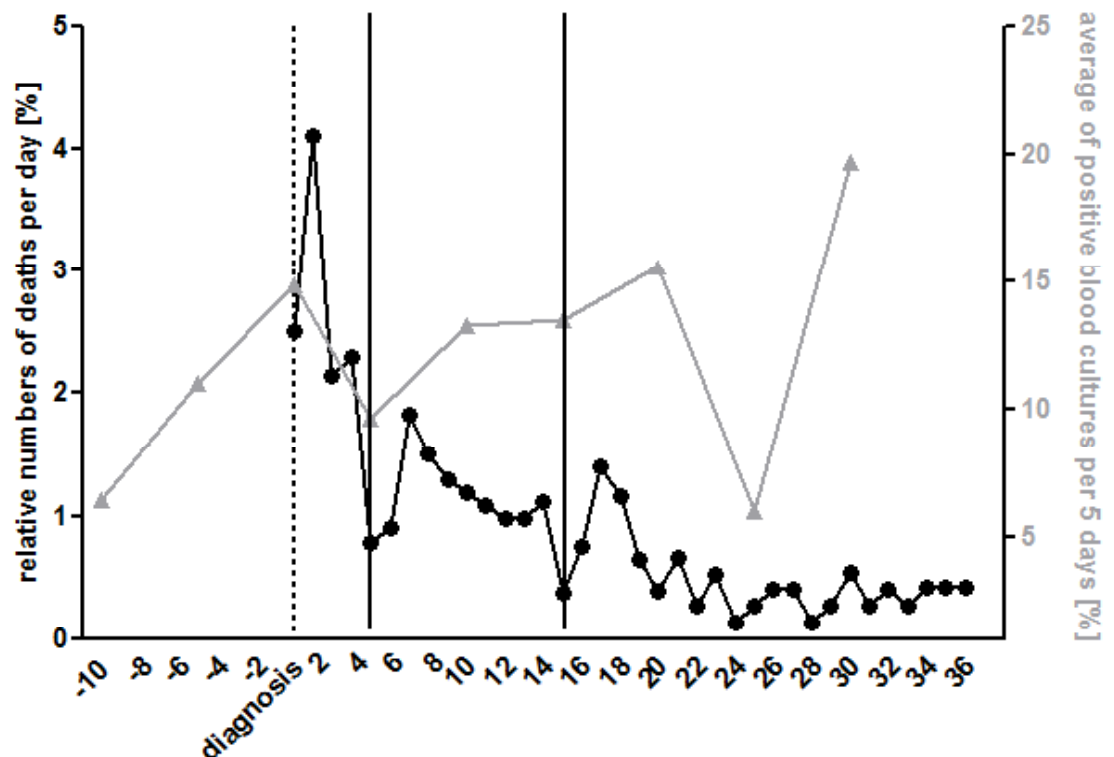

Supplement: MOESM2 [file 9706590]
